# Supplementary material
Source: PubMed Central journal article supplement (PMC5694391)
Supplement: NIHMS873414-supplement-appendix.pdf [file NIHMS873414-supplement-appendix.pdf]

Appendix Figure A. Experiments 1 - 3 Study Phase Pairs for one participant were comprised of the following paired objects. Note that objects were counterbalanced across subjects.

Temporal-only pairs

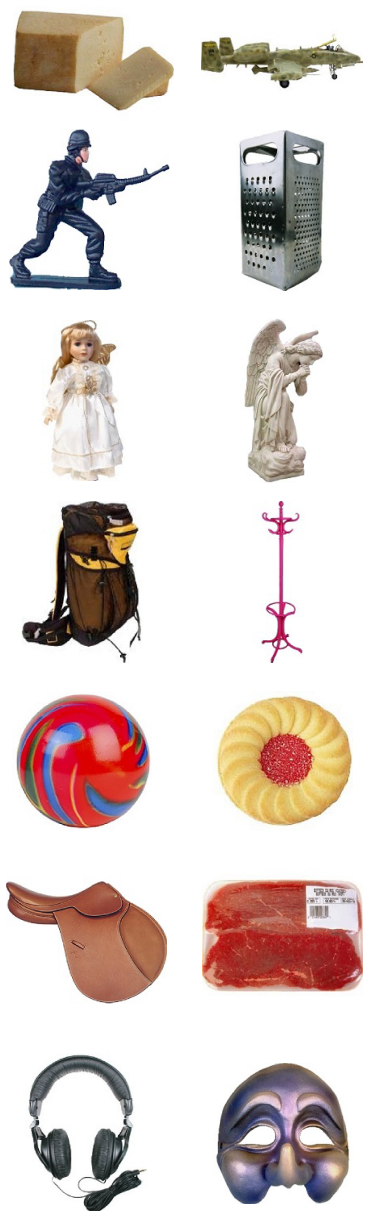

Temporal-plus-semantic pairs

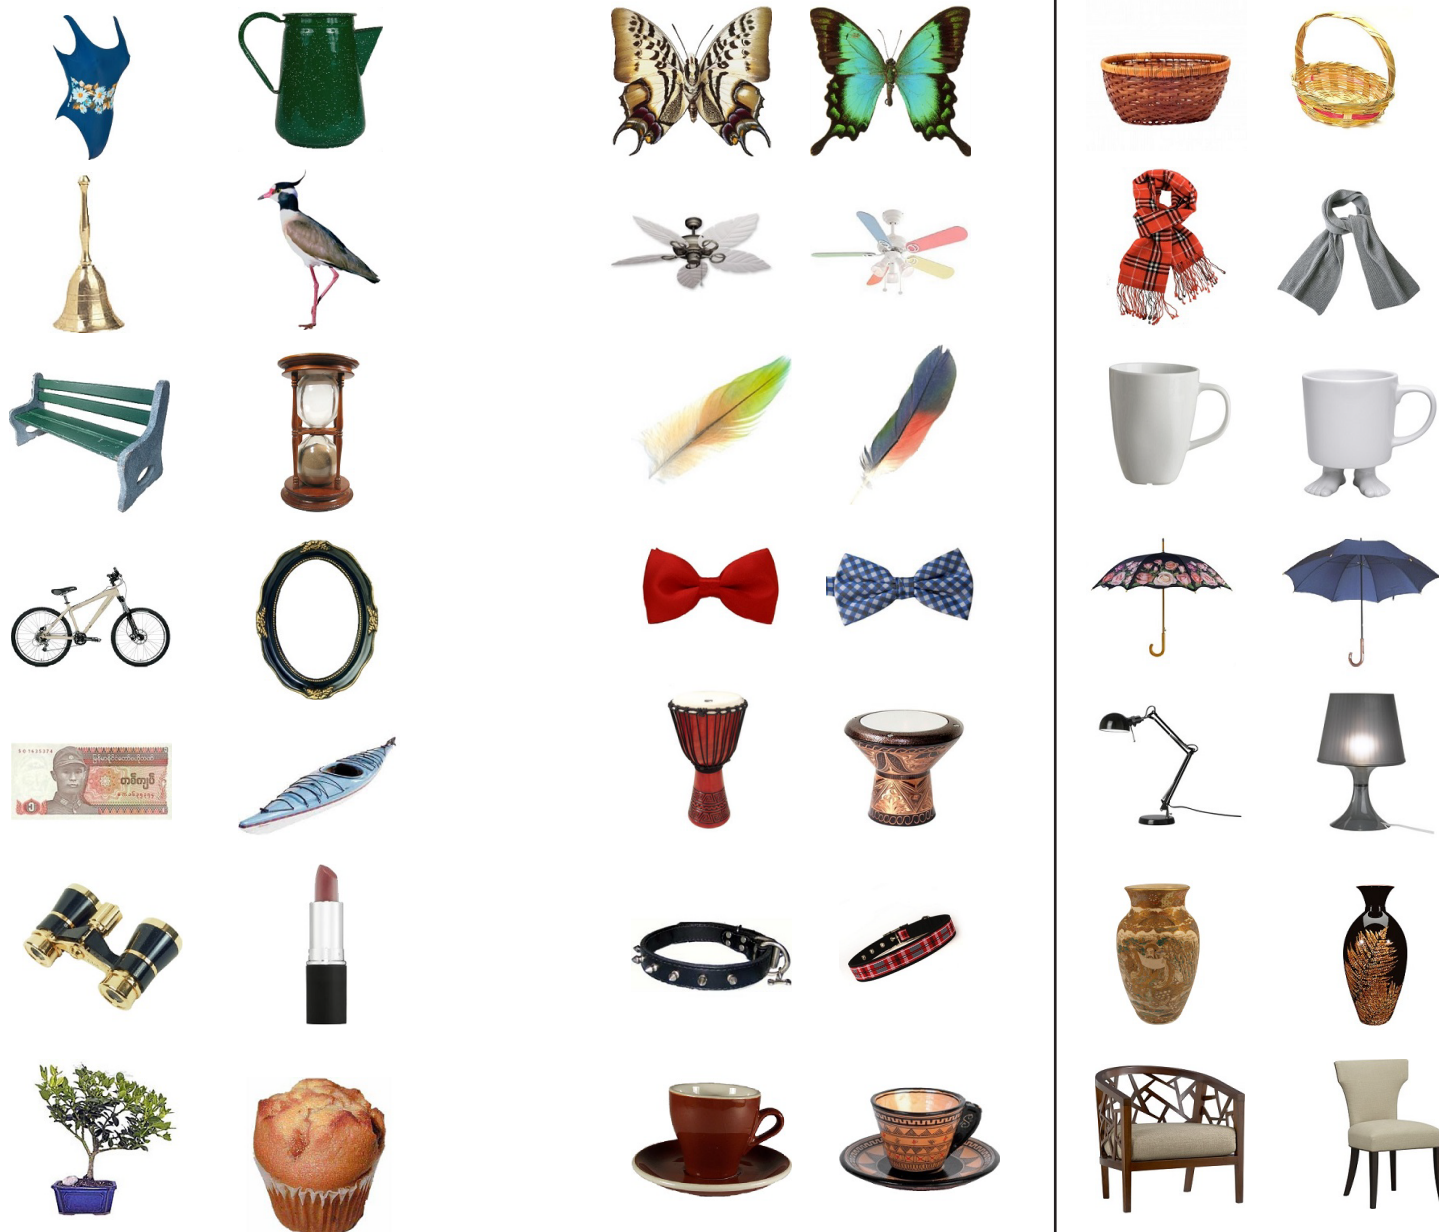

Appendix Figure B. Experiments 1 - 3 Recognition practice phase for one participant was comprised of the following pairs. In this figure, the object on the left was always the “old” object. In the actual experiment however, the “old” object appeared in the left and right positions equally often.

Objects drawn from Temporal-only pairs

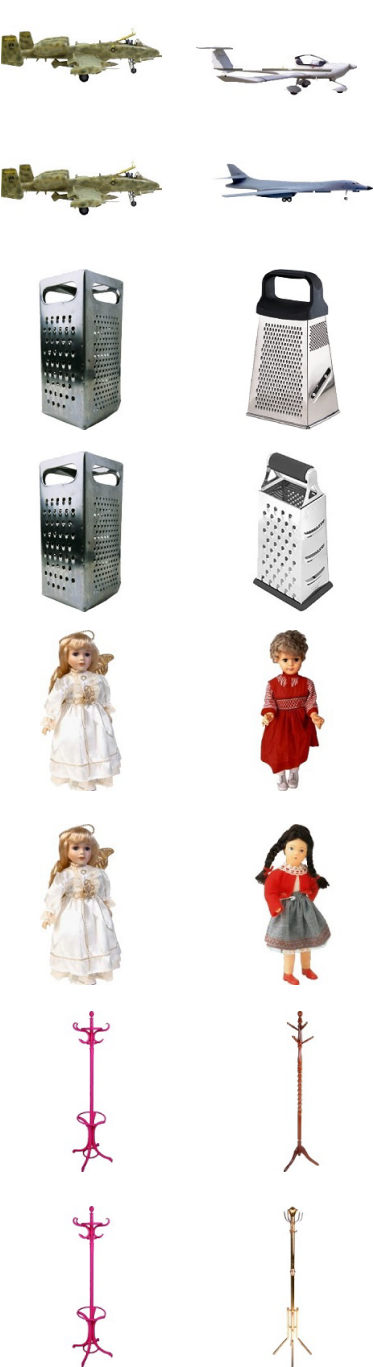

Objects drawn from Temporal-plus-semantic pairs

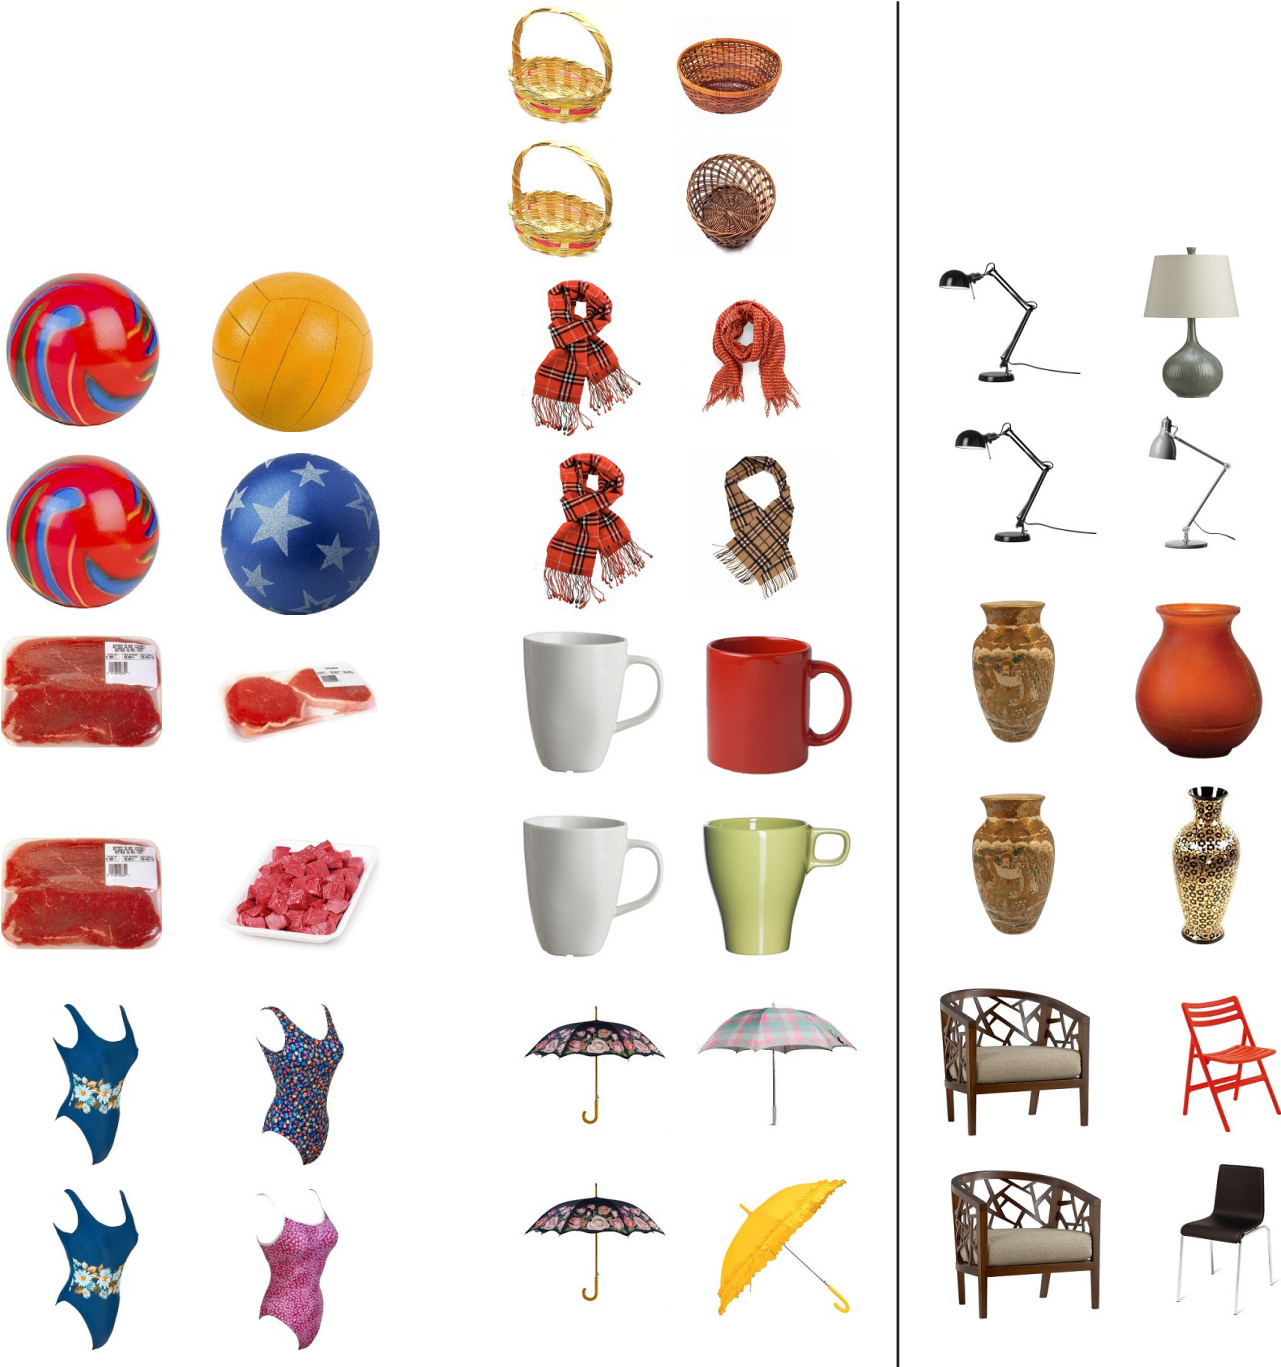

Appendix Figure C. Experiments 1 - 3 Test phase for one participant included all the following objects presented one at a time.

Old objects  
Practiced Objects drawn from Temporal-only pairs

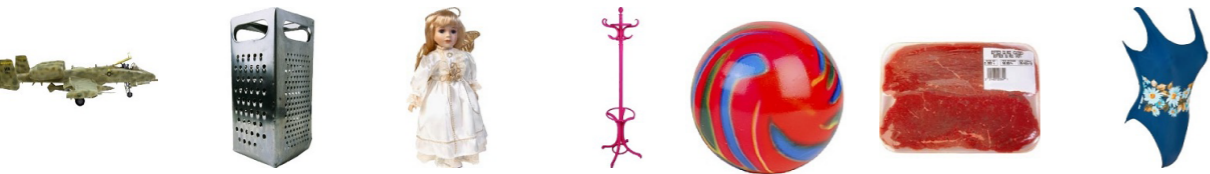

Practiced objects drawn from Temporal-plus-semantic pairs

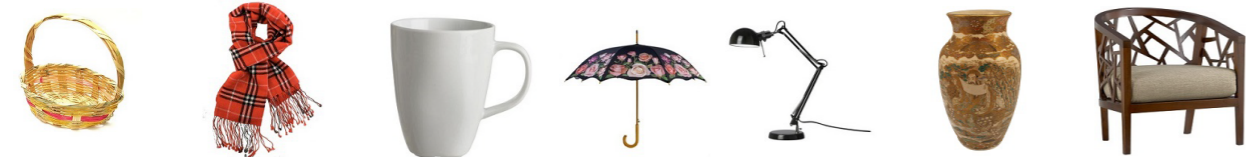

Related objects drawn from Temporal-only pairs

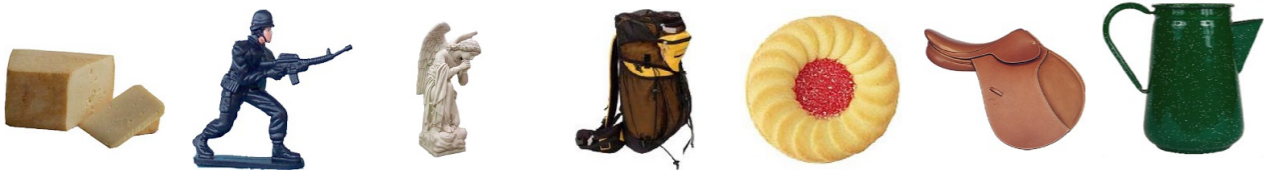

Related objects drawn from Temporal-plus-semantic pairs

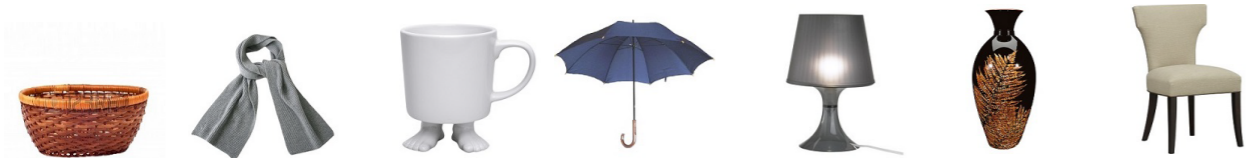

Baseline objects draawn from Temporal-only pairs

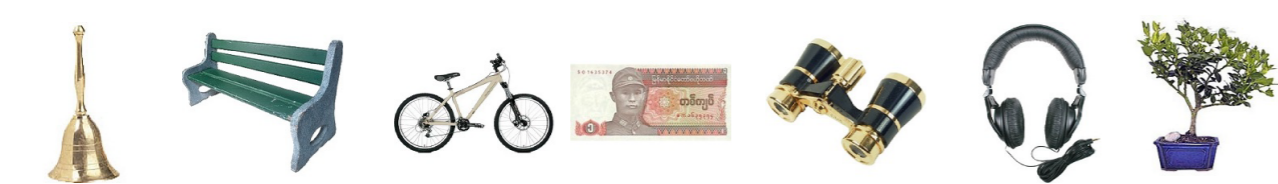

Baseline objects drawn from Temporal-plus-semantic pairs

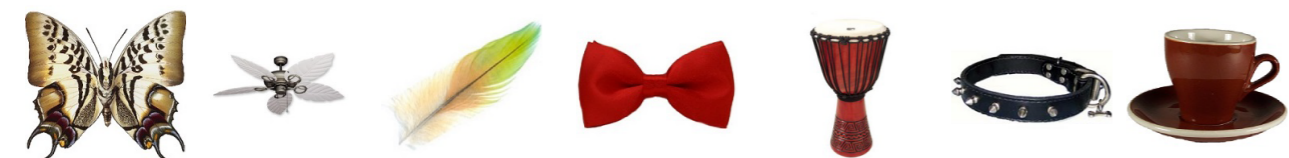

New objects  
Novel objects were drawn from the same semantic category as the old objects. Here they are presented in accordance with the old objects on the left for reference.

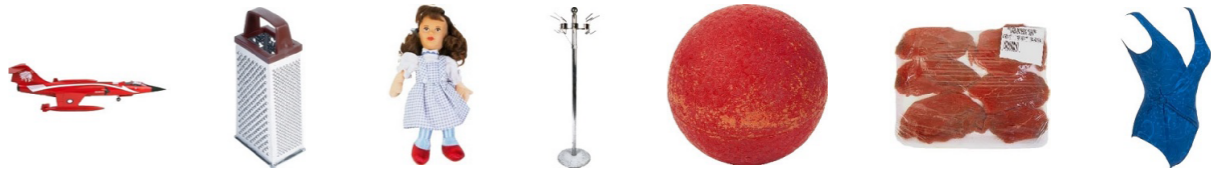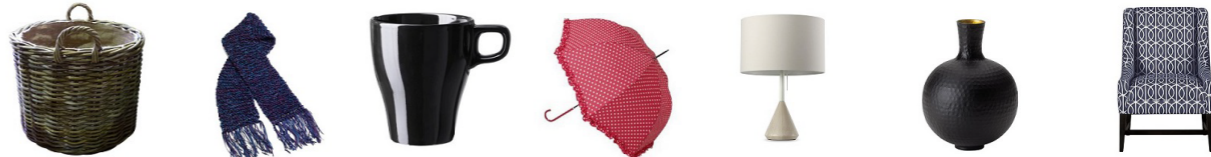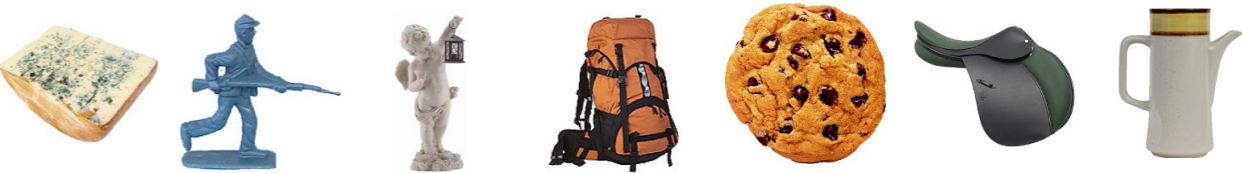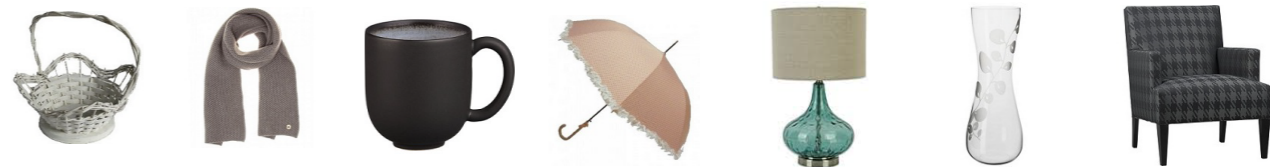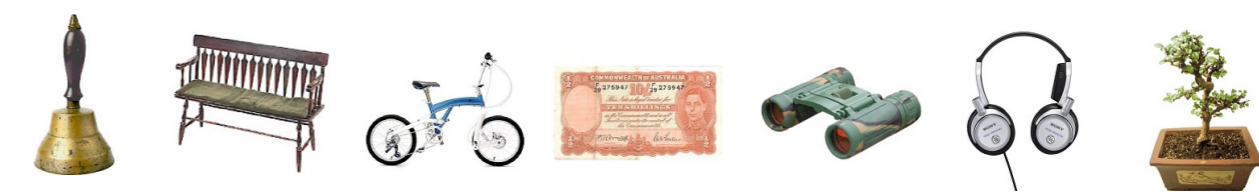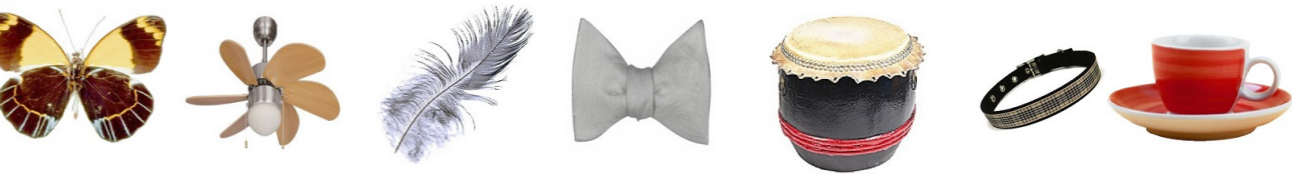

Appendix Figure D. Experiment 4 Study Phase Pairs were comprised of the following paired objects and were present along with the verbal label indicating the scene to which the objects belonged. Note that during the experiment the scene name was presented above the paired objects.

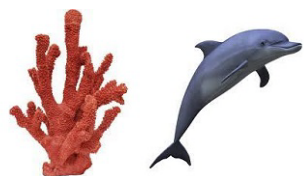

aquarium

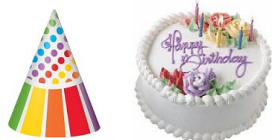

birthday party

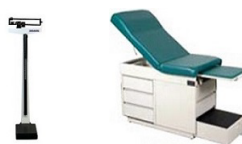

doctor office

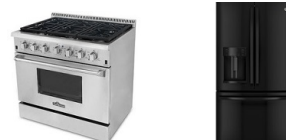

kitchen

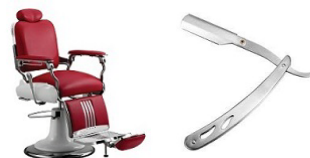

barber shop

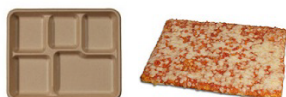

cafeteria

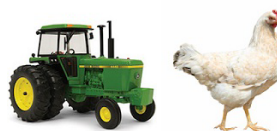

farm

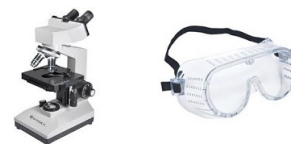

laboratory

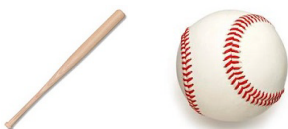

baseball game

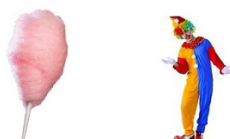

circus

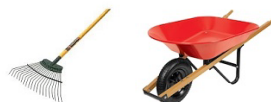

garage

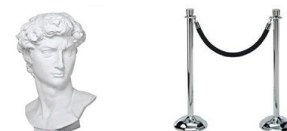

museum

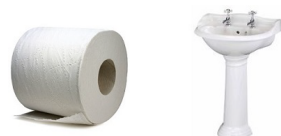

bathroom

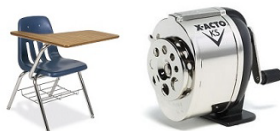

classroom

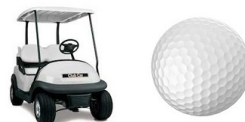

golf course

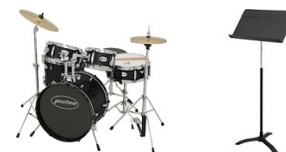

music room

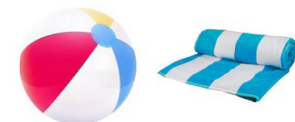

beach

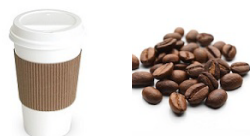

coffee shop

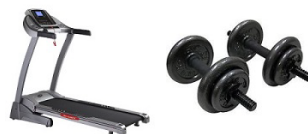

gym

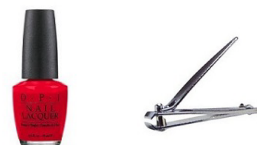

nail salon

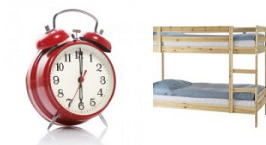

bedroom

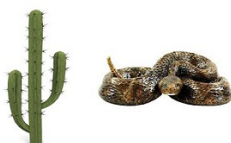

desert

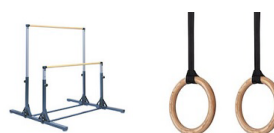

gymnastics studio

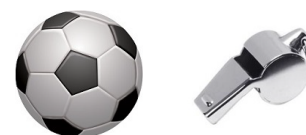

soccer game

Appendix Figure E. Experiment 4 Recognition Practice Phase Pairs were comprised of the following paired objects. In this figure the old object is always in the left for demonstration purposes. The location of the old object (left vs. right) was counterbalanced in the experiment.

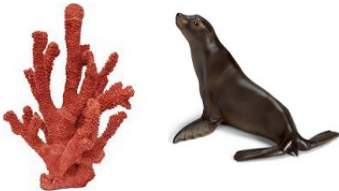

aquarium

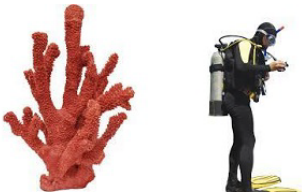

aquarium

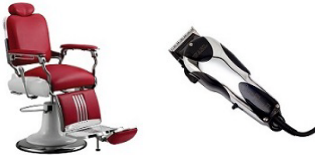

barber shop

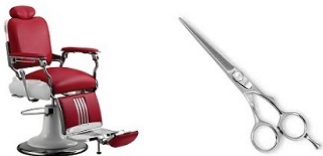

barber shop

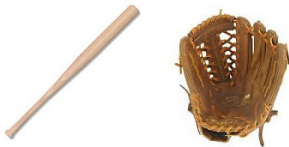

baseball game

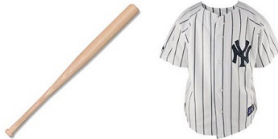

baseball game

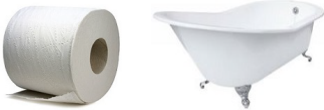

bathroom

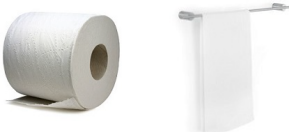

bathroom

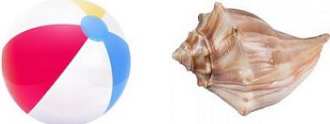

beach

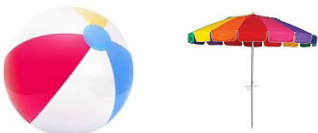

beach

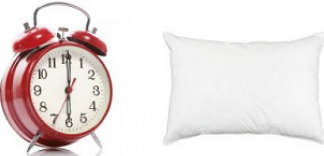

bedroom

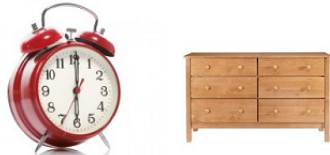

bedroom

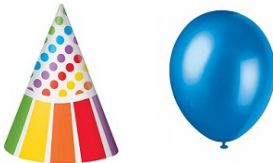

birthday party

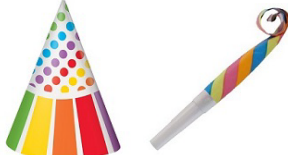

birthday party

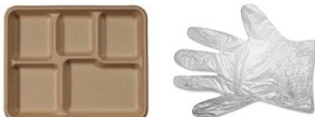

cafeteria

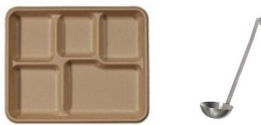

cafeteria

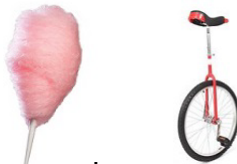

circus

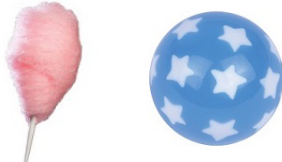

circus

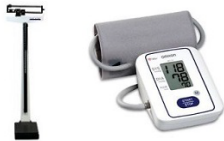

doctor office

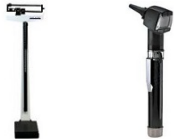

doctor office

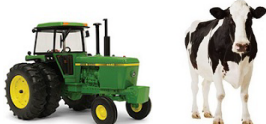

farm

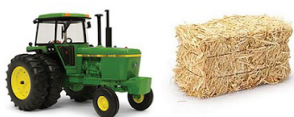

farm

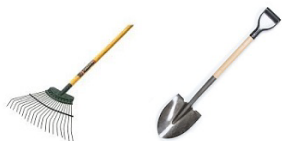

garage

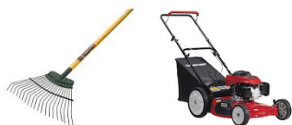

garage

Appendix Figure F. Experiment 4Test Phase objects were comprised of the following objects and scene labels presented sequentially.

| Old objects                                                                        |                                                                                     |                                                                                     |                                                                                     | New objects                                                                           |                                                                                       |                                                                                       |                                                                                       |
|------------------------------------------------------------------------------------|-------------------------------------------------------------------------------------|-------------------------------------------------------------------------------------|-------------------------------------------------------------------------------------|---------------------------------------------------------------------------------------|---------------------------------------------------------------------------------------|---------------------------------------------------------------------------------------|---------------------------------------------------------------------------------------|
| Practiced                                                                          | Related                                                                             | Baseline                                                                            |                                                                                     |                                                                                       |                                                                                       |                                                                                       |                                                                                       |
| 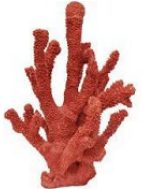   | 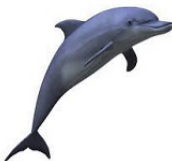   | 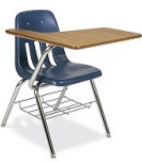   | 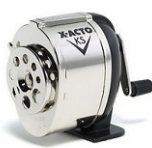   | 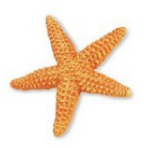    | 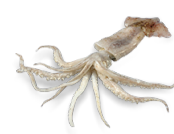   | 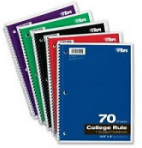   | 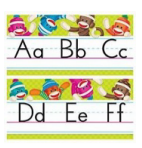   |
| aquarium                                                                           | aquarium                                                                            | classroom                                                                           | classroom                                                                           | aquarium                                                                              | aquarium                                                                              | classroom                                                                             | classroom                                                                             |
| 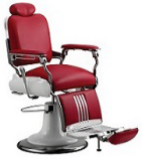   | 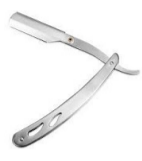   | 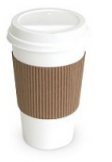   | 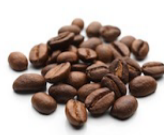   | 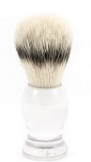   | 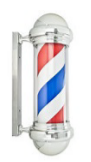   | 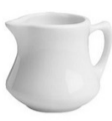   | 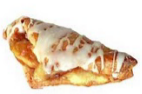   |
| barber shop                                                                        | barber shop                                                                         | coffee shop                                                                         | coffee shop                                                                         | barber shop                                                                           | barber shop                                                                           | coffee shop                                                                           | coffee shop                                                                           |
| 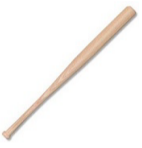   | 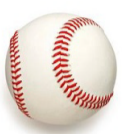   | 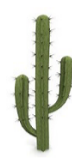   | 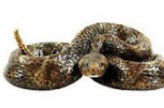   | 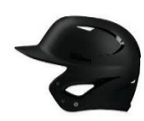    | 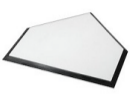   | 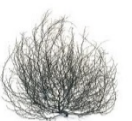   | 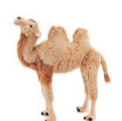   |
| baseball game                                                                      | baseball game                                                                       | desert                                                                              | desert                                                                              | baseball game                                                                         | baseball game                                                                         | desert                                                                                | desert                                                                                |
| 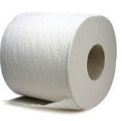   | 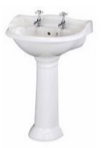   | 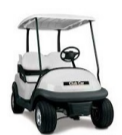   | 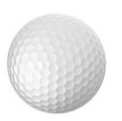   | 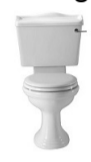   | 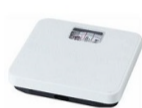   | 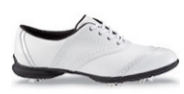   | 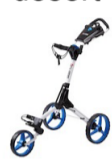   |
| bathroom                                                                           | bathroom                                                                            | golf course                                                                         | golf course                                                                         | bathroom                                                                              | bathroom                                                                              | golf course                                                                           | golf course                                                                           |
| 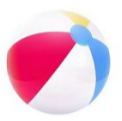 | 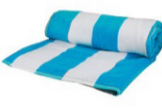 | 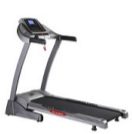 | 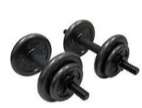 | 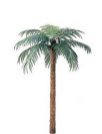 | 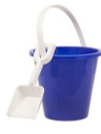 | 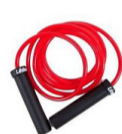 | 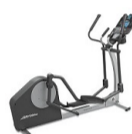 |
| beach                                                                              | beach                                                                               | gym                                                                                 | gym                                                                                 | beach                                                                                 | beach                                                                                 | gym                                                                                   | gym                                                                                   |
| 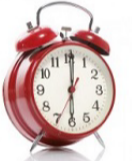 | 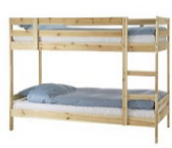 | 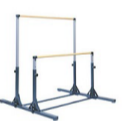 | 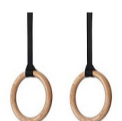 | 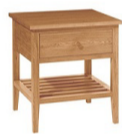 | 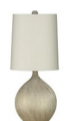 | 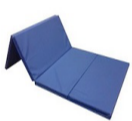 | 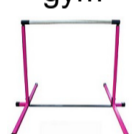 |
| bedroom                                                                            | bedroom                                                                             | gymnastics studio                                                                   | gymnastics studio                                                                   | bedroom                                                                               | bedroom                                                                               | gymnastics studio                                                                     | gymnastics studio                                                                     |
| 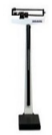 | 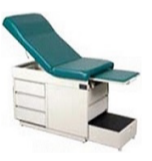 | 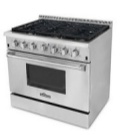 | 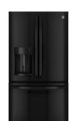 | 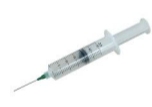 | 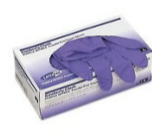 | 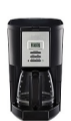 | 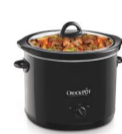 |
| doctor office                                                                      | doctor office                                                                       | kitchen                                                                             | kitchen                                                                             | doctor office                                                                         | doctor office                                                                         | kitchen                                                                               | kitchen                                                                               |
| 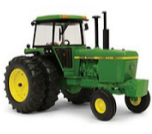 | 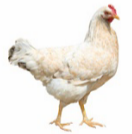 | 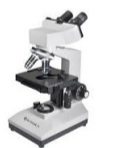 | 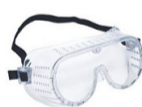 | 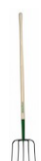 | 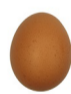 | 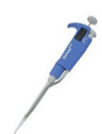 | 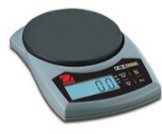 |
| farm                                                                               | farm                                                                                | laboratory                                                                          | laboratory                                                                          | farm                                                                                  | farm                                                                                  | laboratory                                                                            | laboratory                                                                            |
| 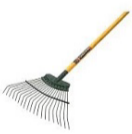 | 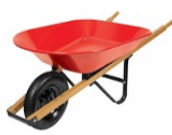 | 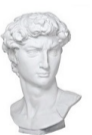 | 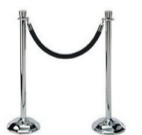 | 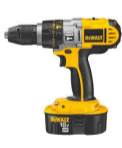 | 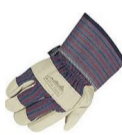 | 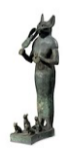 | 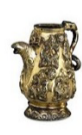 |
| garage                                                                             | garage                                                                              | museum                                                                              | museum                                                                              | garage                                                                                | garage                                                                                | museum                                                                                | museum                                                                                |
| 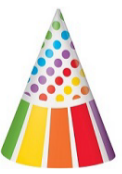 | 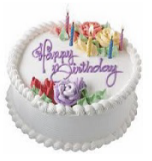 | 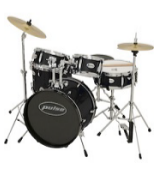 | 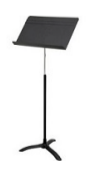 | 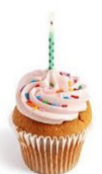 | 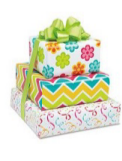 | 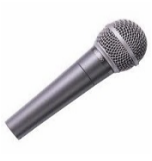 | 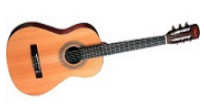 |
| birthday party                                                                     | birthday party                                                                      | band room                                                                           | band room                                                                           | birthday party                                                                        | birthday party                                                                        | music room                                                                            | music room                                                                            |
| 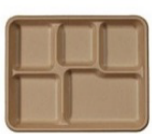 | 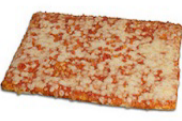 | 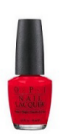 | 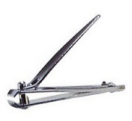 | 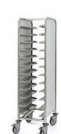 | 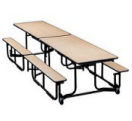 | 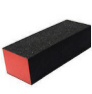 | 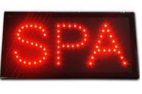 |
| cafeteria                                                                          | cafeteria                                                                           | nail salon                                                                          | nail salon                                                                          | cafeteria                                                                             | cafeteria                                                                             | nail salon                                                                            | nail salon                                                                            |
| 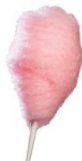 | 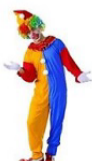 | 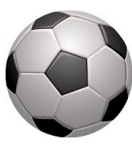 | 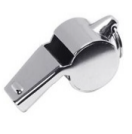 | 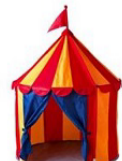 | 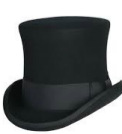 | 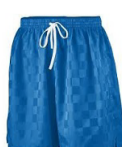 | 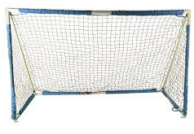 |
| circus                                                                             | circus                                                                              | soccer game                                                                         | soccer game                                                                         | circus                                                                                | circus                                                                                | soccer game                                                                           | soccer game                                                                           |
